# Supplementary material for: Pridopidine, a dopamine stabilizer, improves motor performance and shows neuroprotective effects in Huntington disease R6/2 mouse model
Source: PubMed Central journal article supplement (PMC4627560; doi:10.1111/jcmm.12604), 2015-06-22
Supplement: jcmm0019-2540-sd1.pdf [file jcmm0019-2540-sd1.pdf]

# Supplementary Figure 1

**A**

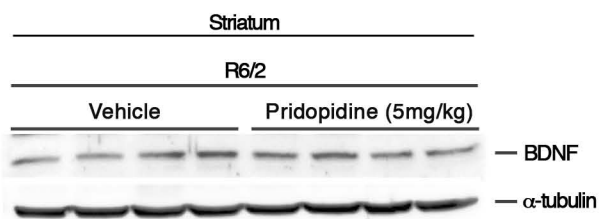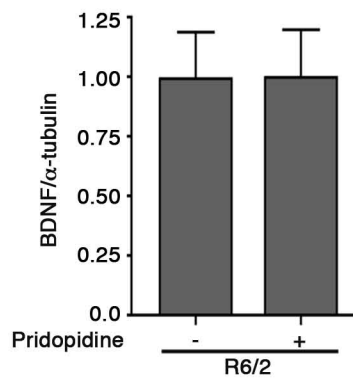

**B**

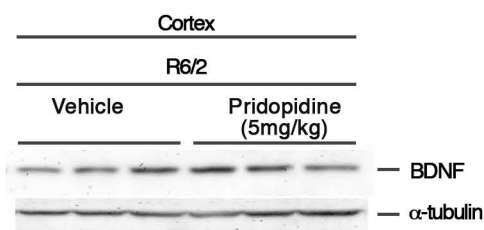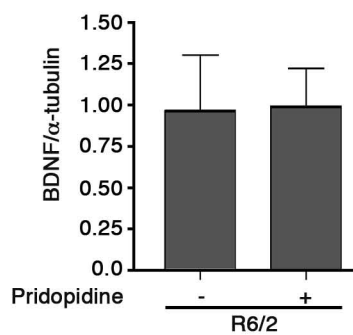

**C**

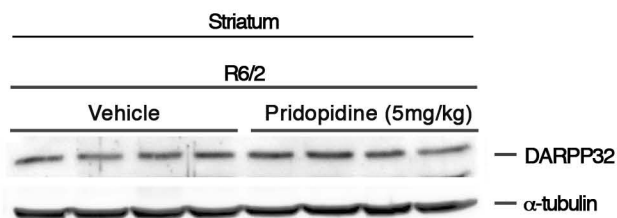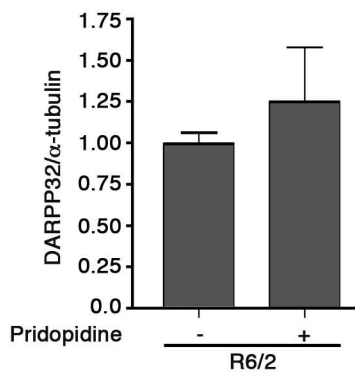



## Supplementary Figure 3

R6/2 Striatum

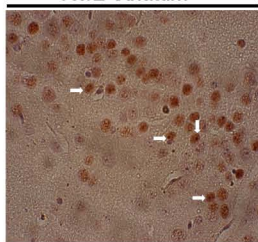

EM48 positive cells

Supplementary Figure 4

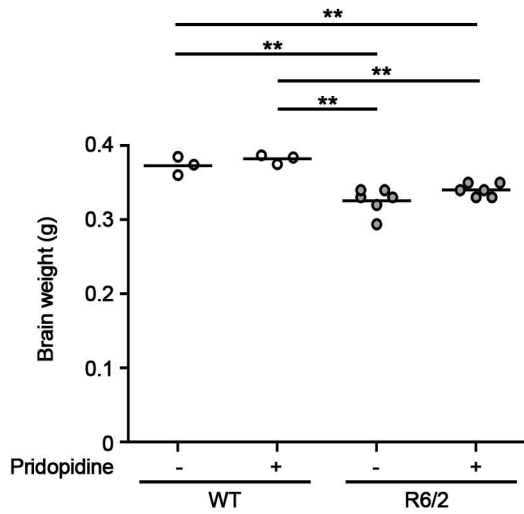

Supplementary Figure 5

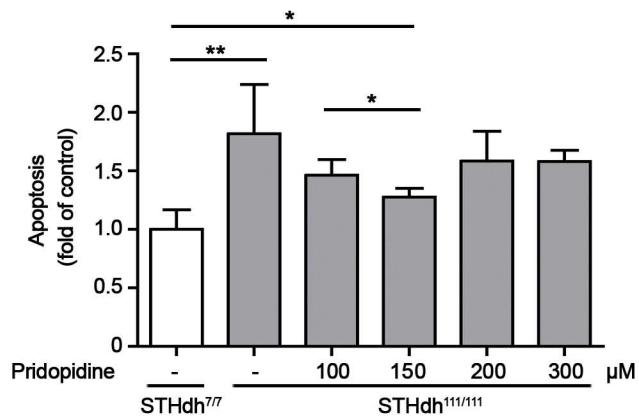

# Supplementary Figure 6

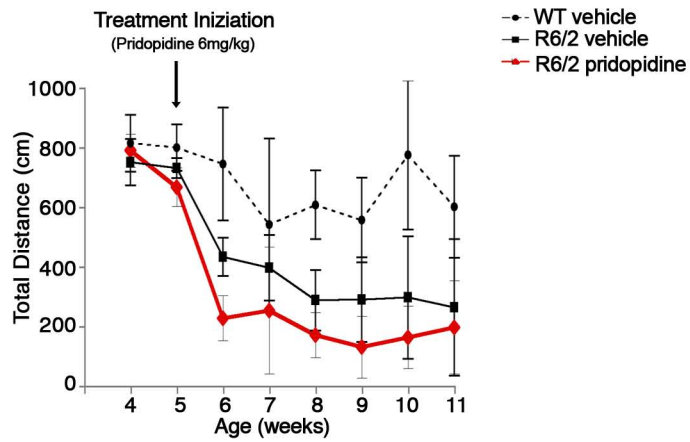

**Supplementary Figure 1. Chronic administration of pridopidine at constant dose fails to enhance cerebral expression of both BDNF and DARPP32. (A-B)** Representative Western Blottings and densitometric analyses of BDNF protein expression in striatal and cortical tissue of vehicle- and pridopidine-treated R6/2 mice. **(C)** Representative Western Blotting and densitometric analysis of DARPP32 in striatal tissues of the same mice. Data are represented as mean  $\pm$  SD. n=5 for each group of mice.

**Supplementary Figure 2. Change of pridopidine dose does not increase expression of BDNF in the cortex of R6/2 mice.** Representative Western Blotting of BDNF protein expression in cortical tissue of vehicle- and pridopidine-treated R6/2 mice. Data are represented as mean  $\pm$  SD, n=5 for each group of mice.

**Supplementary Figure 3. mHtt aggregates are detectable at presymptomatic stage of the disease.** Representative micrograph of EM48 positive cells from WT and R6/2 mouse striatum. Arrows indicate mHtt aggregates.

**Supplementary Figure 4. Chronic administration of pridopidine fails to prevent loss of brain weight in R6/2 mice.** Average brain weight of vehicle- and pridopidine -treated WT and R6/2 mice. Vehicle- and pridopidine-treated WT mice n=5 for each group; vehicle-treated R6/2 mice n=7; pridopidine-treated mice n=7, \*\*, p<0.001 (Non-parametric Mann Whitey U)

**Supplementary Figure 5. Pridopidine (150 $\mu$ M) resulted to be the effective dose in protecting HD cells from apoptosis.** Apoptosis in striatal-derived cell lines cultured for six hours in serum-free medium in presence or absence of different concentrations of pridopidine. Data are represented as the mean  $\pm$  SD of

two independent experiments performed in quadruplicate. \*,  $p < 0.05$ ; \*\*,  $p < 0.001$   
(non parametric Mann Whitney U)

**Supplementary Figure 6. Chronic administration of pridopidine (6mg/kg) induces hypokinesia in R6/2 mice.** General locomotor activity in the open field in the R6/2, before and after treatment and WT littermates. Each data point represents the average performance  $\pm$  SD of 3 mice for each group.
